# Supplementary material for: Limitation of seedling growth by potassium and magnesium supply for two ectomycorrhizal tree species of a Central African rain forest and its implication for their recruitment
Source: PubMed Central journal article supplement (PMC4716515; doi:10.1002/ece3.1835), 2015-12-15

**Ca**

Fig. S5

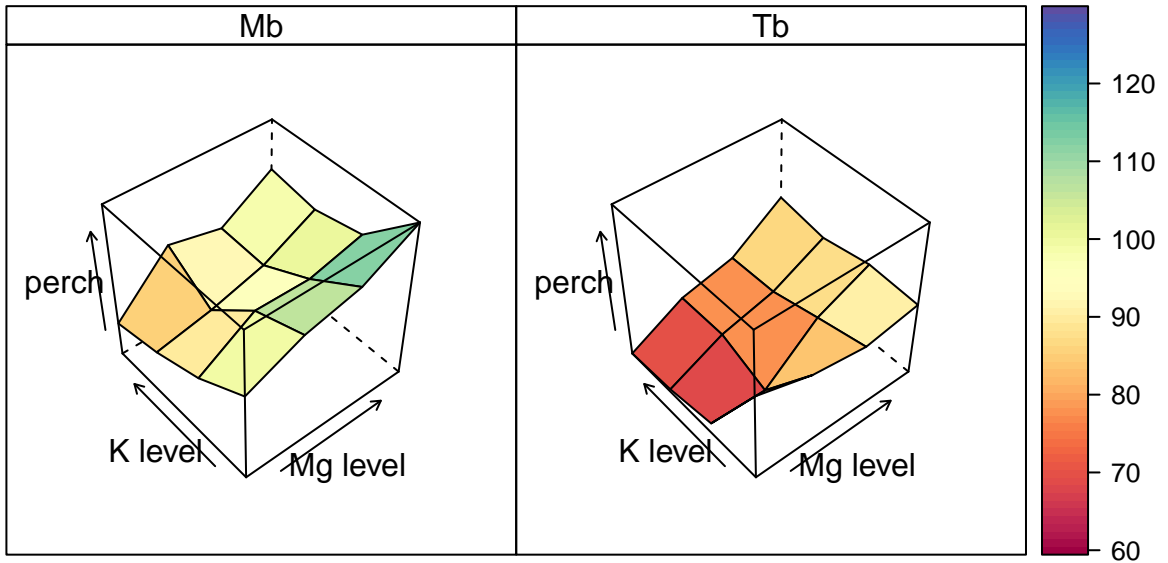**N**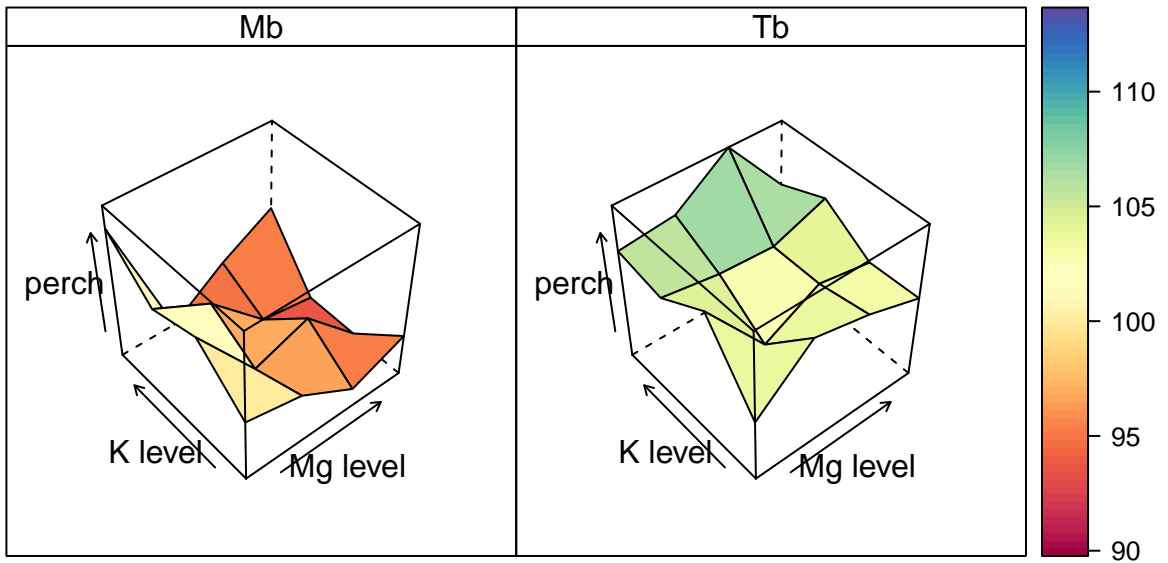

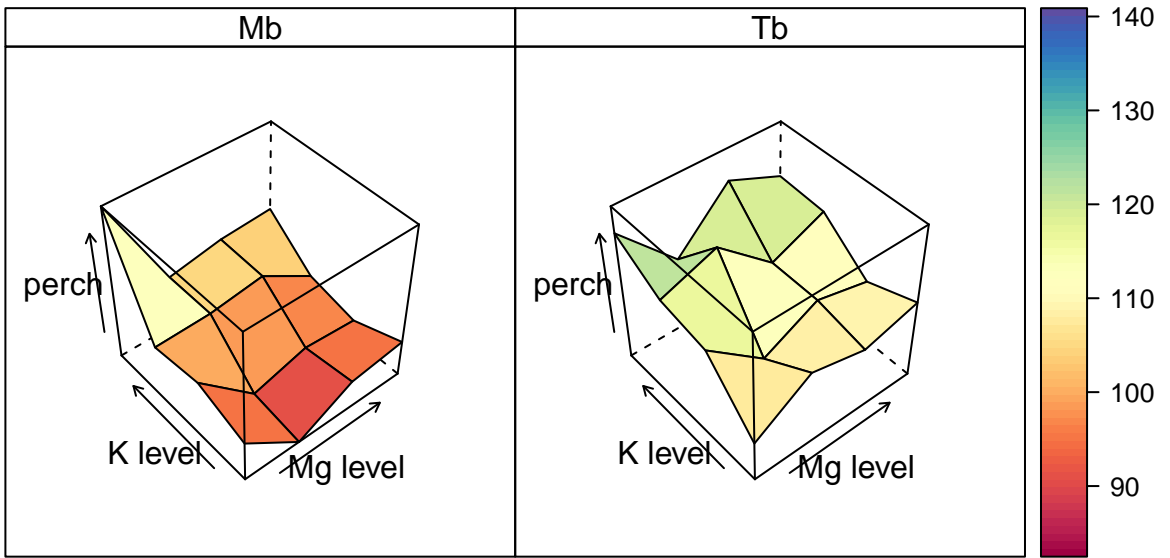

Supplement: ECE3-6-125-s005.pdf [file ECE3-6-125-s005.pdf]
